# Supplementary material
Source: Elsevier journal article supplement (https://www.sciencedirect.com/science/article/pii/S1885585720302619)
Supplement: mmc1 [file S1885585720302619:mmc1.pdf]

**SUPPLEMENTARY DATA****1. Supplementary table 1. Complete list of coinvestigators and their affiliations**

| <b>Name</b>                 | <b>Affiliations</b>                                                                                                                                                        |
|-----------------------------|----------------------------------------------------------------------------------------------------------------------------------------------------------------------------|
| Doyeon Hwang, MD            | Department of Internal Medicine and Cardiovascular Center, Seoul National University Hospital, Seoul, Korea                                                                |
| Jinlong Zhang, MD           | Department of Internal Medicine and Cardiovascular Center, Seoul National University Hospital, Seoul, Korea                                                                |
| Seokhun Yang, MD            | Department of Internal Medicine and Cardiovascular Center, Seoul National University Hospital, Seoul, Korea                                                                |
| Jiesuck Park, MD            | Department of Internal Medicine and Cardiovascular Center, Seoul National University Hospital, Seoul, Korea                                                                |
| Seung Hun Lee, MD, PhD      | Division of Cardiology, Department of Internal Medicine, Heart Vascular Stroke Institute, Samsung Medical Center, Sungkyunkwan University School of Medicine, Seoul, Korea |
| Ki Hong Choi, MD            | Division of Cardiology, Department of Internal Medicine, Heart Vascular Stroke Institute, Samsung Medical Center, Sungkyunkwan University School of Medicine, Seoul, Korea |
| Joo Myung Lee, MD, MPH, PhD | Division of Cardiology, Department of Internal Medicine, Heart Vascular Stroke Institute, Samsung Medical Center, Sungkyunkwan University School of Medicine, Seoul, Korea |
| Ji-Hyun Jung, MD            | Sejong General Hospital, Sejong Heart Institute, Bucheon, Korea                                                                                                            |
| Hyung Yoon Kim, MD          | Department of Cardiovascular Medicine, Chonnam National University Hospital, Gwangju, Korea                                                                                |
| Hae Won Jung, MD            | Department of Cardiology, Daegu Catholic University Medical Center, Daegu, Korea                                                                                           |
| Yun-Kyeong Cho, MD, PhD     | Department of Medicine, Keimyung University Dongsan Medical Center, Daegu, South Korea                                                                                     |
| Hyuck-Jun Yoon, MD, PhD     | Department of Medicine, Keimyung University Dongsan Medical Center, Daegu, South Korea                                                                                     |
| Young Bin Song, MD, PhD     | Division of Cardiology, Department of Internal Medicine, Heart Vascular Stroke Institute, Samsung Medical Center, Sungkyunkwan University School of Medicine, Seoul, Korea |
| Joo-Yong Hahn, MD, PhD      | Division of Cardiology, Department of Internal Medicine, Heart Vascular Stroke Institute, Samsung Medical Center, Sungkyunkwan University School of Medicine, Seoul, Korea |
| Seung-Ho Hur, MD, PhD       | Department of Medicine, Keimyung University Dongsan Medical Center, Daegu, South Korea                                                                                     |
| Masahiro Hoshino, MD        | Division of Cardiovascular Medicine, Tsuchiura Kyodo General Hospital, Ibaraki, Japan                                                                                      |
| Yoshihisa Kanaji, MD        | Division of Cardiovascular Medicine, Tsuchiura Kyodo General Hospital, Ibaraki, Japan                                                                                      |
| Rikuta Hamaya, MD           | Division of Cardiovascular Medicine, Tsuchiura Kyodo General Hospital, Ibaraki, Japan                                                                                      |
| Yoshinori Kanno, MD         | Division of Cardiovascular Medicine, Tsuchiura Kyodo General Hospital, Ibaraki, Japan                                                                                      |
| Masahiro Hada, MD           | Division of Cardiovascular Medicine, Tsuchiura Kyodo General Hospital, Ibaraki, Japan                                                                                      |
| Masao Yamaguchi, MD         | Division of Cardiovascular Medicine, Tsuchiura Kyodo General                                                                                                               |

## Prognostic implications of coronary physiological indices in patients with diabetes mellitus

|                             |                                                                                                                                                                            |
|-----------------------------|----------------------------------------------------------------------------------------------------------------------------------------------------------------------------|
|                             | Hospital, Ibaraki, Japan                                                                                                                                                   |
| Hiroaki Ohya, MD            | Division of Cardiovascular Medicine, Tsuchiura Kyodo General Hospital, Ibaraki, Japan                                                                                      |
| Yohei Sumino, MD            | Division of Cardiovascular Medicine, Tsuchiura Kyodo General Hospital, Ibaraki, Japan                                                                                      |
| Eisuke Usui, MD             | Division of Cardiovascular Medicine, Tsuchiura Kyodo General Hospital, Ibaraki, Japan                                                                                      |
| Akinori Sugano, MD          | Division of Cardiovascular Medicine, Tsuchiura Kyodo General Hospital, Ibaraki, Japan                                                                                      |
| Tomoyo Sugiyama, MD, PhD    | Division of Cardiovascular Medicine, Tsuchiura Kyodo General Hospital, Ibaraki, Japan                                                                                      |
| Tadashi Murai, MD, PhD      | Division of Cardiovascular Medicine, Tsuchiura Kyodo General Hospital, Ibaraki, Japan                                                                                      |
| Tetsumin Lee, MD            | Department of Cardiovascular Medicine, Tokyo Medical and Dental University, Tokyo, Japan                                                                                   |
| Taishi Yonetsu, MD          | Department of Cardiovascular Medicine, Tokyo Medical and Dental University, Tokyo, Japan                                                                                   |
| Hernán Mejía-Rentería, MD   | Cardiovascular Institute, Hospital Clinico San Carlos, Madrid, Spain                                                                                                       |
| Francesco Lauri, MD         | Cardiovascular Institute, Hospital Clinico San Carlos, Madrid, Spain                                                                                                       |
| Sonoka Goto, MD             | Cardiovascular Institute, Hospital Clinico San Carlos, Madrid, Spain                                                                                                       |
| Fernando Macaya, MD         | Cardiovascular Institute, Hospital Clinico San Carlos, Madrid, Spain                                                                                                       |
| Angela McInerney, MD        | Cardiovascular Institute, Hospital Clinico San Carlos, Madrid, Spain                                                                                                       |
| Giacomo Gravina, MD         | Cardiovascular Institute, Hospital Clinico San Carlos, Madrid, Spain                                                                                                       |
| Rafael Vera, MD             | Cardiovascular Institute, Hospital Clinico San Carlos, Madrid, Spain                                                                                                       |
| Nieves Gonzalo, MD          | Cardiovascular Institute, Hospital Clinico San Carlos, Madrid, Spain                                                                                                       |
| Pilar Jimenez-Quevedo, MD   | Cardiovascular Institute, Hospital Clinico San Carlos, Madrid, Spain                                                                                                       |
| Ivan Nuñez-Gil, MD          | Cardiovascular Institute, Hospital Clinico San Carlos, Madrid, Spain                                                                                                       |
| Pablo Salinas, MD           | Cardiovascular Institute, Hospital Clinico San Carlos, Madrid, Spain                                                                                                       |
| Luis Nombela-Franco, MD     | Cardiovascular Institute, Hospital Clinico San Carlos, Madrid, Spain                                                                                                       |
| Maria del Trigo, MD         | Cardiovascular Institute, Hospital Clinico San Carlos, Madrid, Spain                                                                                                       |
| Antonio Fernández-Ortiz, MD | Cardiovascular Institute, Hospital Clinico San Carlos, Madrid, Spain                                                                                                       |
| Carlos Macaya, MD           | Cardiovascular Institute, Hospital Clinico San Carlos, Madrid, Spain                                                                                                       |
| Tsunekazu Kakuta, MD, PHD   | Division of Cardiovascular Medicine, Tsuchiura Kyodo General Hospital, Ibaraki, Japan                                                                                      |
| Javier Escaned, MD, PhD     | Cardiovascular Institute, Hospital Clinico San Carlos, Madrid, Spain<br>Centro Nacional de Investigaciones Cardiovasculares Carlos III (CNIC), Madrid, Spain               |
| Bon-Kwon Koo, MD, PhD       | Department of Internal Medicine and Cardiovascular Center, Seoul National University Hospital, Seoul, Korea<br>Institute on Aging, Seoul National University, Seoul, Korea |

## Prognostic implications of coronary physiological indices in patients with diabetes mellitus

### 2. Supplementary figure 1. Association between CFR and the patient-oriented composite outcome.

**Supplementary Figure 1. Association between CFR and patient-oriented composite outcome**

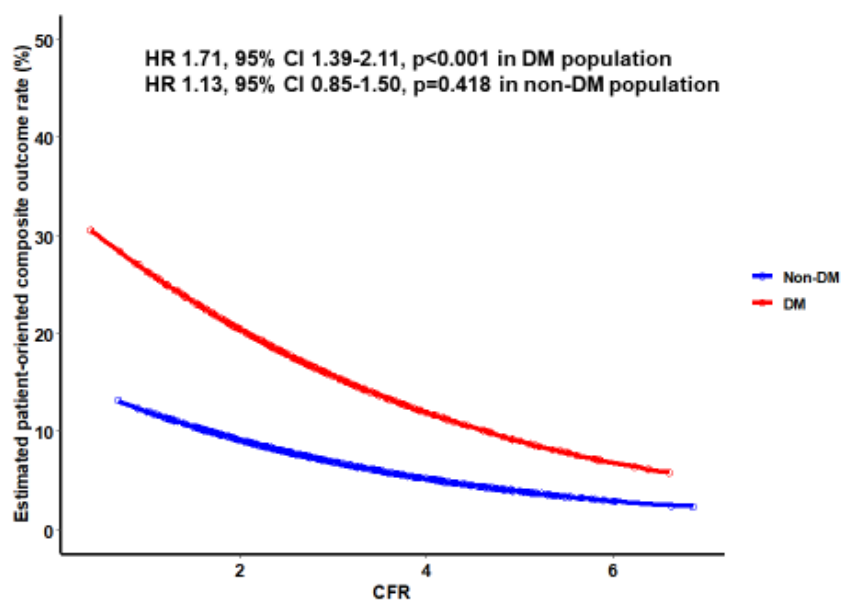

The estimated risk of the patient-oriented composite outcome and its relationship with coronary flow reserve is shown. CFR, coronary flow reserve; CI, confidence interval; DM, diabetes mellitus; HR, hazard ratio.
